# Supplementary material for: tRNAGlyGCC-Derived Internal Fragment (i-tRF-GlyGCC) in Ovarian Cancer Treatment Outcome and Progression
Source: MDPI journal article supplement (doi:10.3390/cancers14010024), 2021-12-22
Supplement: s1 [file s1]

**Table S2.** Univariate and Multivariate Cox regression analysis in the screening cohort.

|                                                             | Univariate analysis   |                     |                              |                                      |                                           |                                 |                     |                              |                                      |                                           |
|-------------------------------------------------------------|-----------------------|---------------------|------------------------------|--------------------------------------|-------------------------------------------|---------------------------------|---------------------|------------------------------|--------------------------------------|-------------------------------------------|
|                                                             | Overall survival (OS) |                     |                              |                                      |                                           | Progression-free survival (PFS) |                     |                              |                                      |                                           |
| Covariant<br>tested <i>vs.</i> control (HR=1)               | HR <sup>a</sup>       | 95% CI <sup>b</sup> | <i>p</i> -value <sup>c</sup> | Bootstrap<br>BCa 95% CI <sup>d</sup> | Bootstrap<br><i>p</i> -value <sup>c</sup> | HR <sup>a</sup>                 | 95% CI <sup>b</sup> | <i>p</i> -value <sup>c</sup> | Bootstrap<br>BCa 95% CI <sup>d</sup> | Bootstrap<br><i>p</i> -value <sup>c</sup> |
| <b>i-tRF-GlyGCC</b><br>High <i>vs.</i> Low                  | 2.507                 | 1.482-4.250         | 0.001                        | 1.502-4.419                          | 0.002                                     | 1.830                           | 1.111-3.013         | 0.018                        | 1.105-3.187                          | 0.016                                     |
| <b>FIGO</b><br>IV/III <i>vs.</i> I/II                       | 5.600                 | 1.752-17.900        | 0.004                        | 2.010-30.846                         | 0.007                                     | 5.411                           | 1.961-14.932        | 0.001                        | 2.296-26.602                         | 0.002                                     |
| <b>Grade</b><br>G2/G3/Und <i>vs.</i> G1                     | 3.059                 | 1.307-7.157         | 0.010                        | 1.220-13.053                         | 0.021                                     | 2.773                           | 1.297-5.931         | 0.009                        | 1.239-9.526                          | 0.007                                     |
| <b>Residual tumor</b><br>>1cm <i>vs.</i> <1cm <i>vs.</i> no | 2.777                 | 2.052-3.757         | <0.001                       | 2.121-4.080                          | 0.001                                     | 2.559                           | 1.917-3.415         | <0.001                       | 1.919-3.951                          | 0.001                                     |
| <b>Response to chemotherapy</b><br>PD <i>vs.</i> CR/PR/SD   | 2.864                 | 1.691-4.853         | <0.001                       | 1.716-5.551                          | 0.001                                     | 4.276                           | 2.497-7.323         | <0.001                       | 2.649-7.352                          | 0.001                                     |
| <b>Age</b><br>≥65y <i>vs.</i> <65y                          | 1.373                 | 0.842-2.237         | 0.204                        | 0.820-2.413                          | 0.208                                     | 1.271                           | 0.798-2.024         | 0.312                        | 0.791-2.075                          | 0.336                                     |

|                                                             | Multivariate analysis <sup>e</sup> |                     |                              |                                      |                                           |                                 |                     |                              |                                      |                                           |
|-------------------------------------------------------------|------------------------------------|---------------------|------------------------------|--------------------------------------|-------------------------------------------|---------------------------------|---------------------|------------------------------|--------------------------------------|-------------------------------------------|
|                                                             | Overall survival (OS)              |                     |                              |                                      |                                           | Progression-free survival (PFS) |                     |                              |                                      |                                           |
| Covariant<br>tested <i>vs.</i> control (HR=1)               | HR <sup>a</sup>                    | 95% CI <sup>b</sup> | <i>p</i> -value <sup>c</sup> | Bootstrap<br>BCa 95% CI <sup>d</sup> | Bootstrap<br><i>p</i> -value <sup>c</sup> | HR <sup>a</sup>                 | 95% CI <sup>b</sup> | <i>p</i> -value <sup>c</sup> | Bootstrap<br>BCa 95% CI <sup>d</sup> | Bootstrap<br><i>p</i> -value <sup>c</sup> |
| <b>i-tRF-GlyGCC</b><br>High <i>vs.</i> Low                  | 2.062                              | 1.160-3.665         | 0.014                        | 0.978-4.581                          | 0.030                                     | 1.433                           | 0.834-2.464         | 0.193                        | 0.704-2.826                          | 0.226                                     |
| <b>FIGO</b><br>IV/III <i>vs.</i> I/II                       | 1.207                              | 0.343-4.243         | 0.769                        | 0.263-358254                         | 0.729                                     | 2.029                           | 0.588-6.995         | 0.263                        | 0.268-1199001                        | 0.189                                     |
| <b>Grade</b><br>G2/G3/Und <i>vs.</i> G1                     | 1.949                              | 0.720-5.281         | 0.189                        | 0.820-9.516                          | 0.181                                     | 1.934                           | 0.778-4.810         | 0.156                        | 0.655-264342                         | 0.154                                     |
| <b>Residual tumor</b><br>>1cm <i>vs.</i> <1cm <i>vs.</i> no | 2.171                              | 1.530-3.080         | <0.001                       | 1.392-4.923                          | 0.002                                     | 1.916                           | 1.378-2.665         | <0.001                       | 1.219-4.943                          | 0.004                                     |
| <b>Response to chemotherapy</b><br>PD <i>vs.</i> CR/PR/SD   | 2.197                              | 1.192-4.050         | 0.012                        | 1.172-5.557                          | 0.013                                     | 3.220                           | 1.720-6.027         | <0.001                       | 1.637-8.207                          | 0.001                                     |
| <b>Age</b><br>≥65y <i>vs.</i> <65y                          | 0.830                              | 0.473-1.456         | 0.516                        | 0.345-1.946                          | 0.593                                     | 0.830                           | 0.487-1.413         | 0.492                        | 0.429-1.505                          | 0.568                                     |

<sup>a</sup> Hazard Ratio

<sup>b</sup> 95% confidence interval of the estimated HR

<sup>c</sup> calculated by test for trend. Bootstrap *p*-value is based on 1000 bootstrap samples

<sup>d</sup> Bootstrap bias-corrected and accelerated 95% confidence interval of the estimated HR based on 1000 bootstrap samples

<sup>e</sup> Multivariate analysis adjusted for i-tRF-GlyGCC levels, FIGO stage, tumor grade, residual tumor, response to chemotherapy and age.
